# Supplementary material for: The role of moisture transport for precipitation onthe interannual and inter-daily fluctuations of thearctic sea ice extension
Source: Copernicus journal article supplement (doi:10.5194/esd-2018-59), 2018-09-11
Supplement: Supplementary file 1 [file esd-2018-59-supplement.pdf]

1 **Supplementary material**

2 **THE ROLE OF MOISTURE TRANSPORT FOR PRECIPITATION ON**  
3 **THE INTERANNUAL AND INTER-DAILY FLUCTUATIONS OF THE**  
4 **ARCTIC SEA ICE EXTENSION**

5 **Luis Gimeno-Sotelo<sup>1</sup>, Raquel Nieto<sup>2</sup>, Marta Vázquez<sup>2</sup>, Luis Gimeno<sup>2\*</sup>**

7 <sup>1</sup>Facultade de Matemáticas, Universidade de Santiago de Compostela, 15782 Spain.

8 <sup>2</sup>Environmental Physics Laboratory (EphysLab), Universidade de Vigo, Ourense, 32004, Spain

9 **\* Correspondence:**

10 Luis Gimeno

11 l.gimeno@uvigo.es

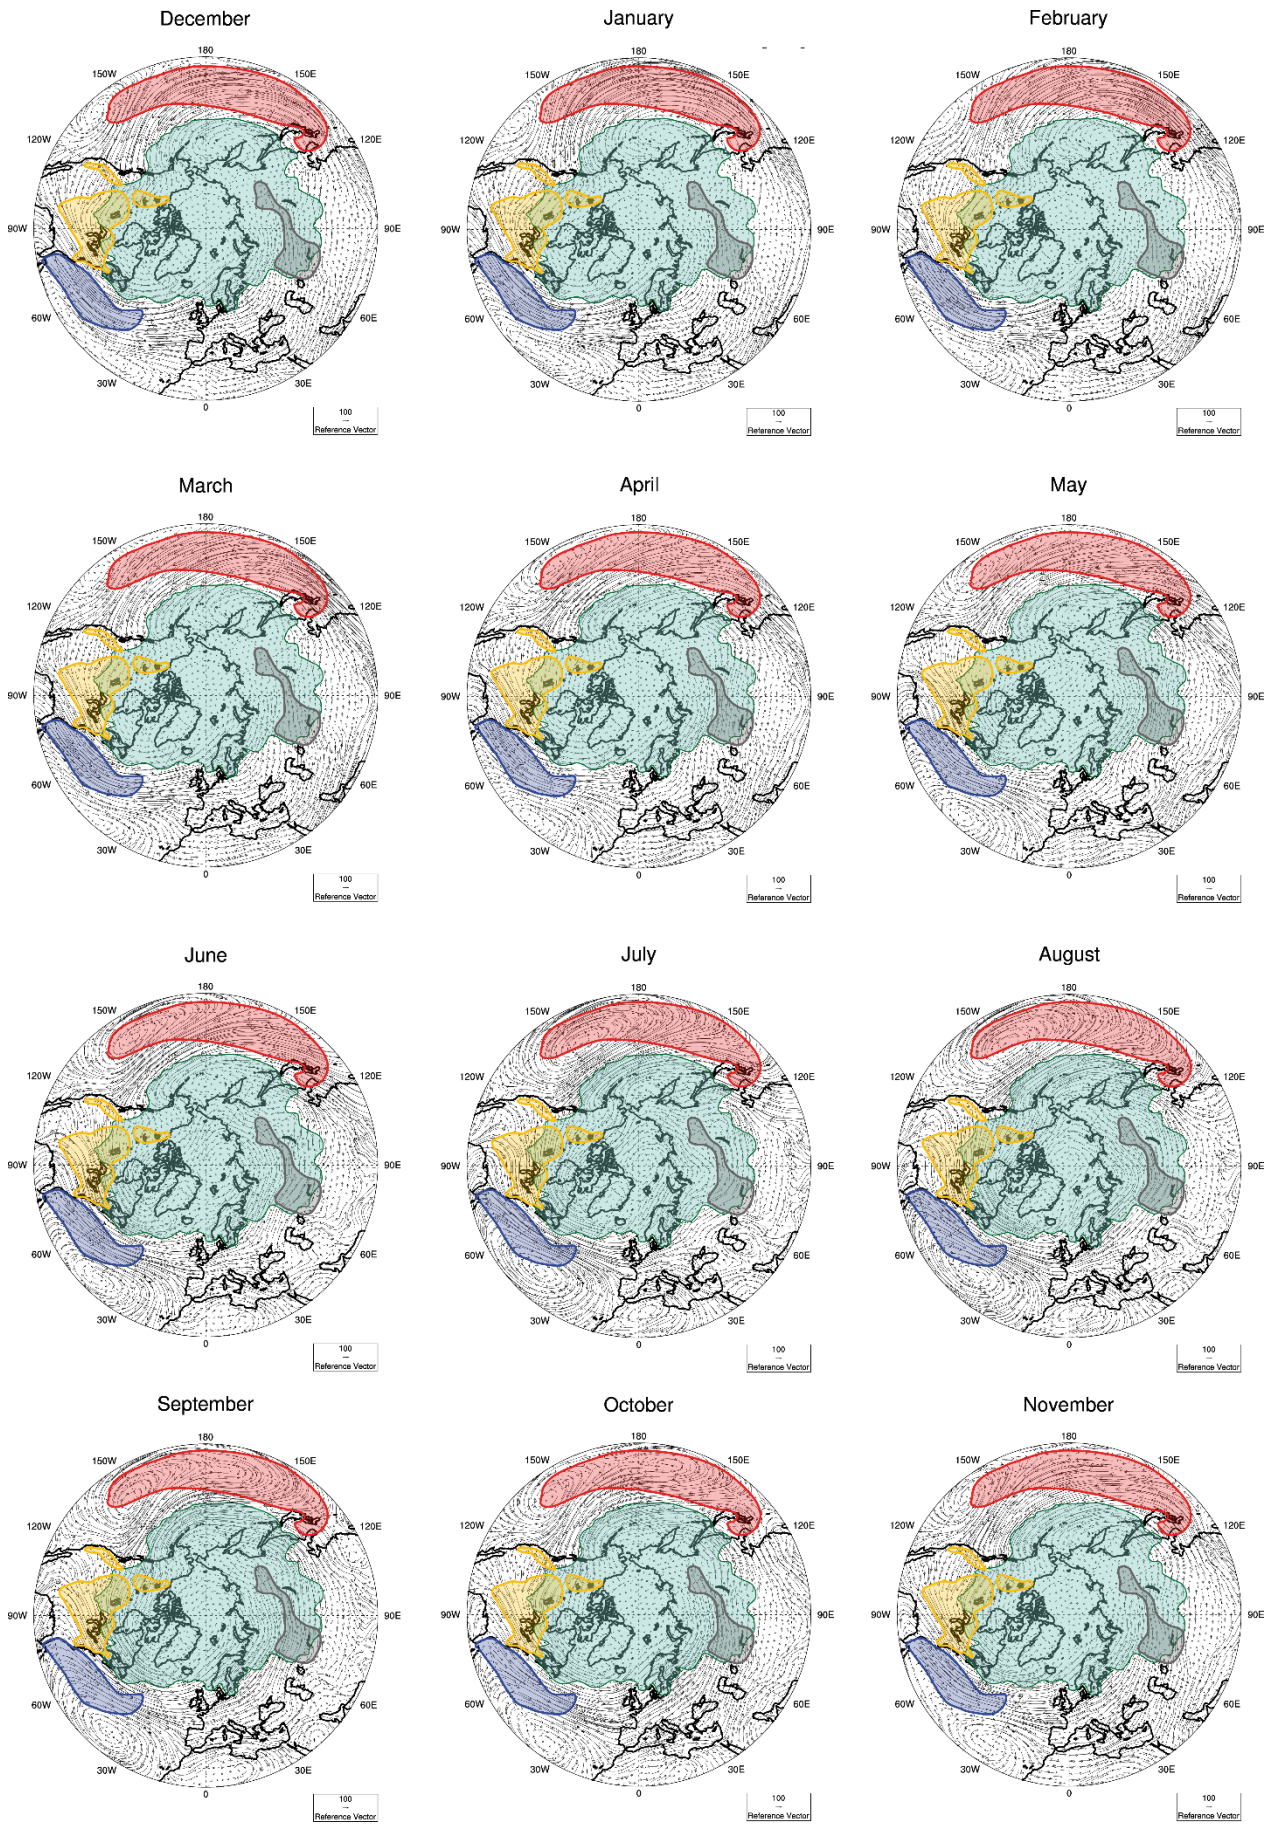

12

13 **Figure S1**

# VIMF DIFFERENCE BETWEEN MINIMUM AND MAXIMUM SIE

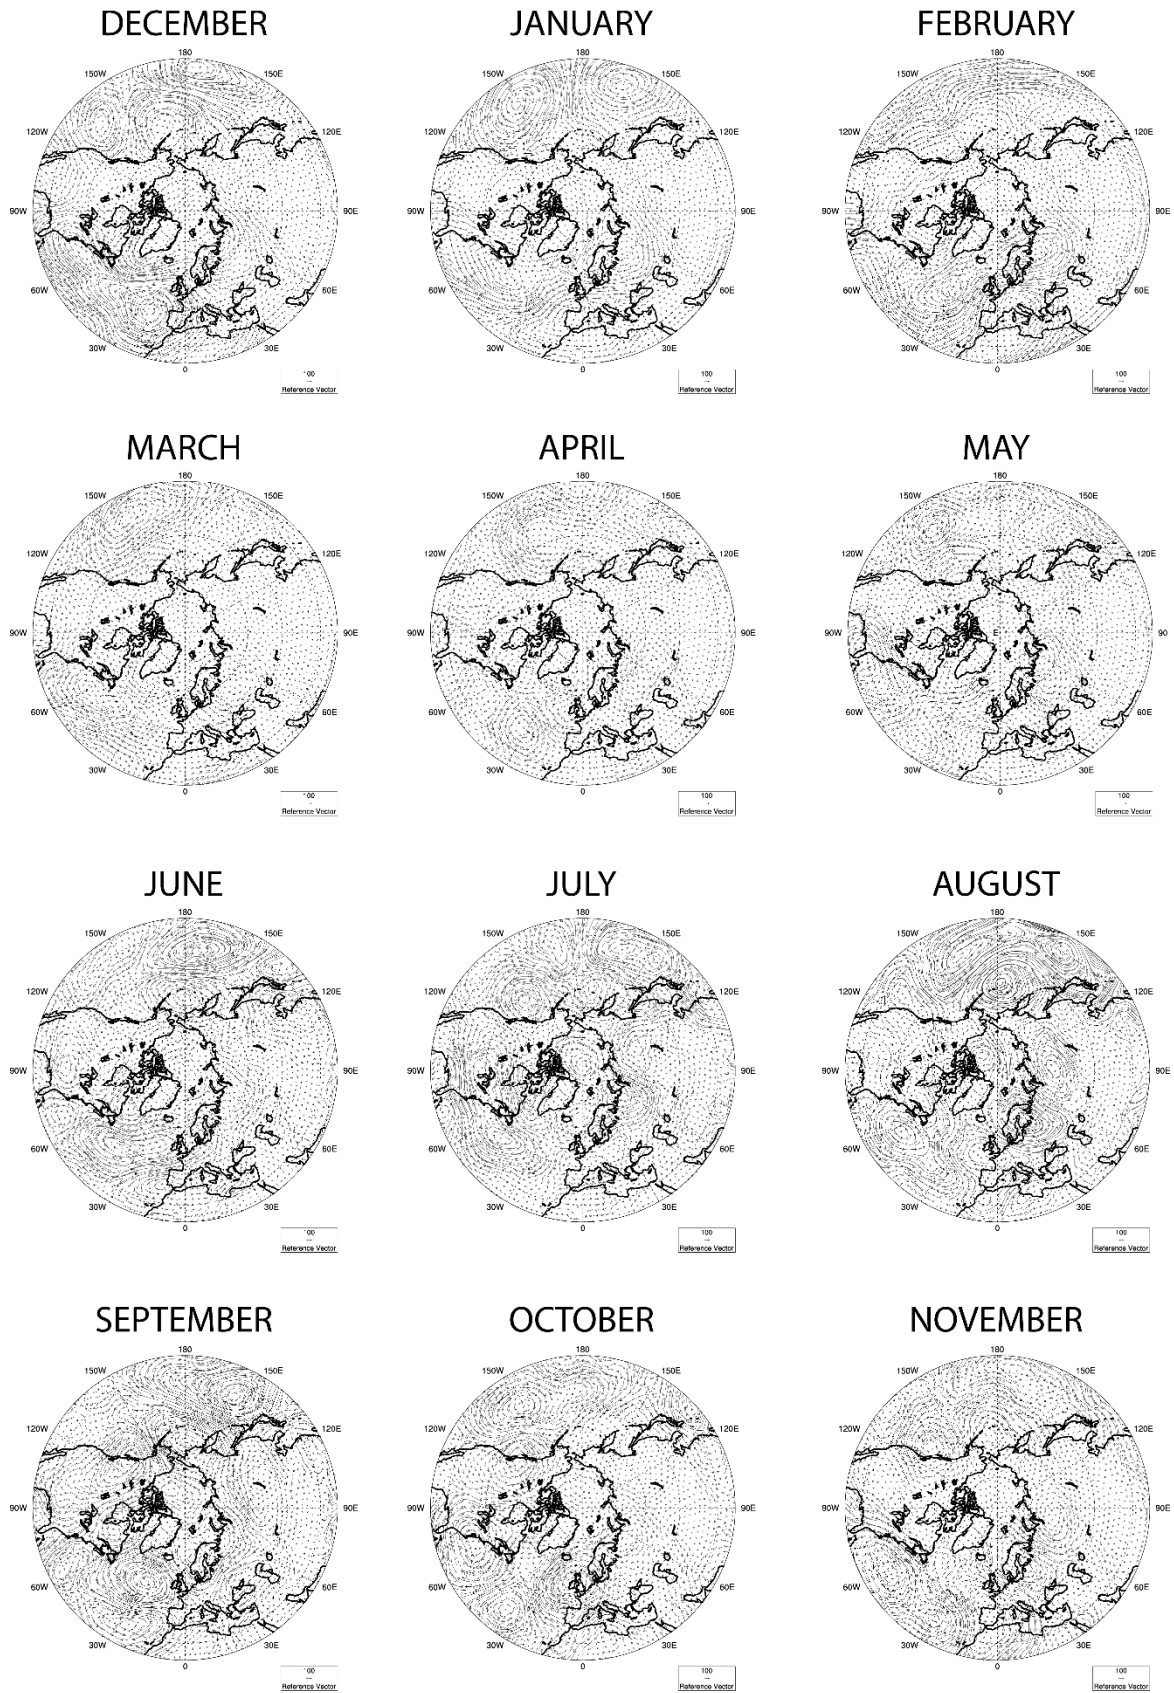

14

15 **Figure S2**

# CTCs

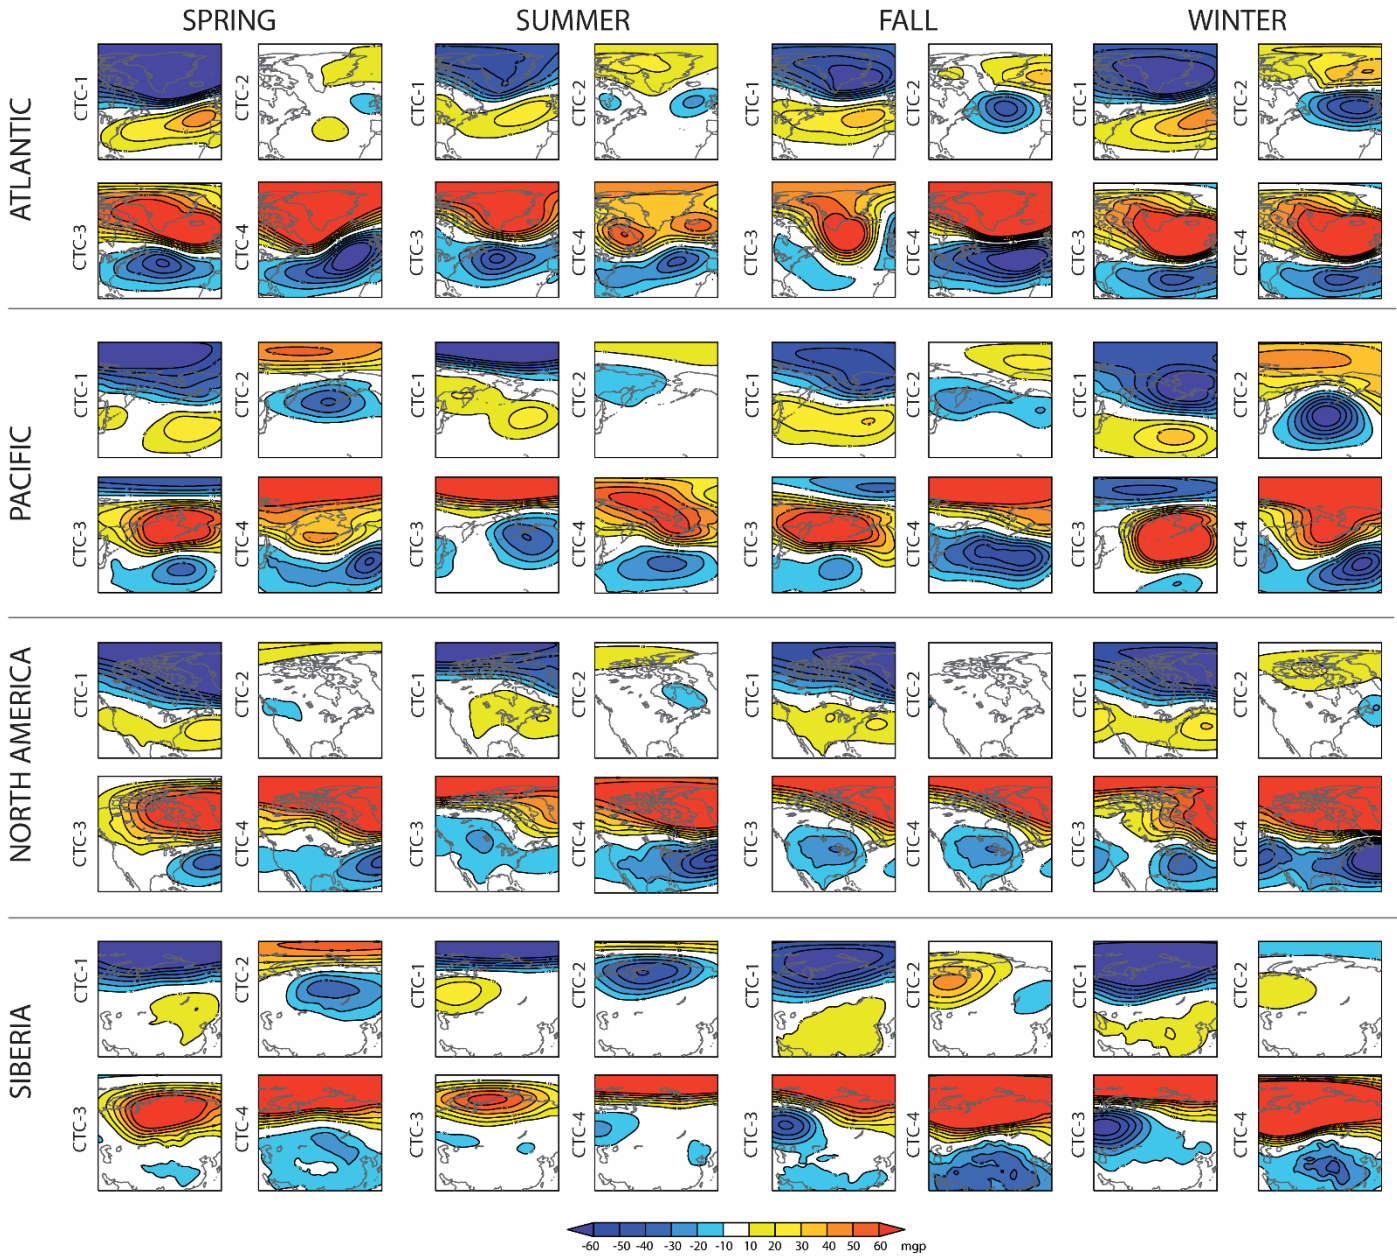

16

17 **Figure S3**

18

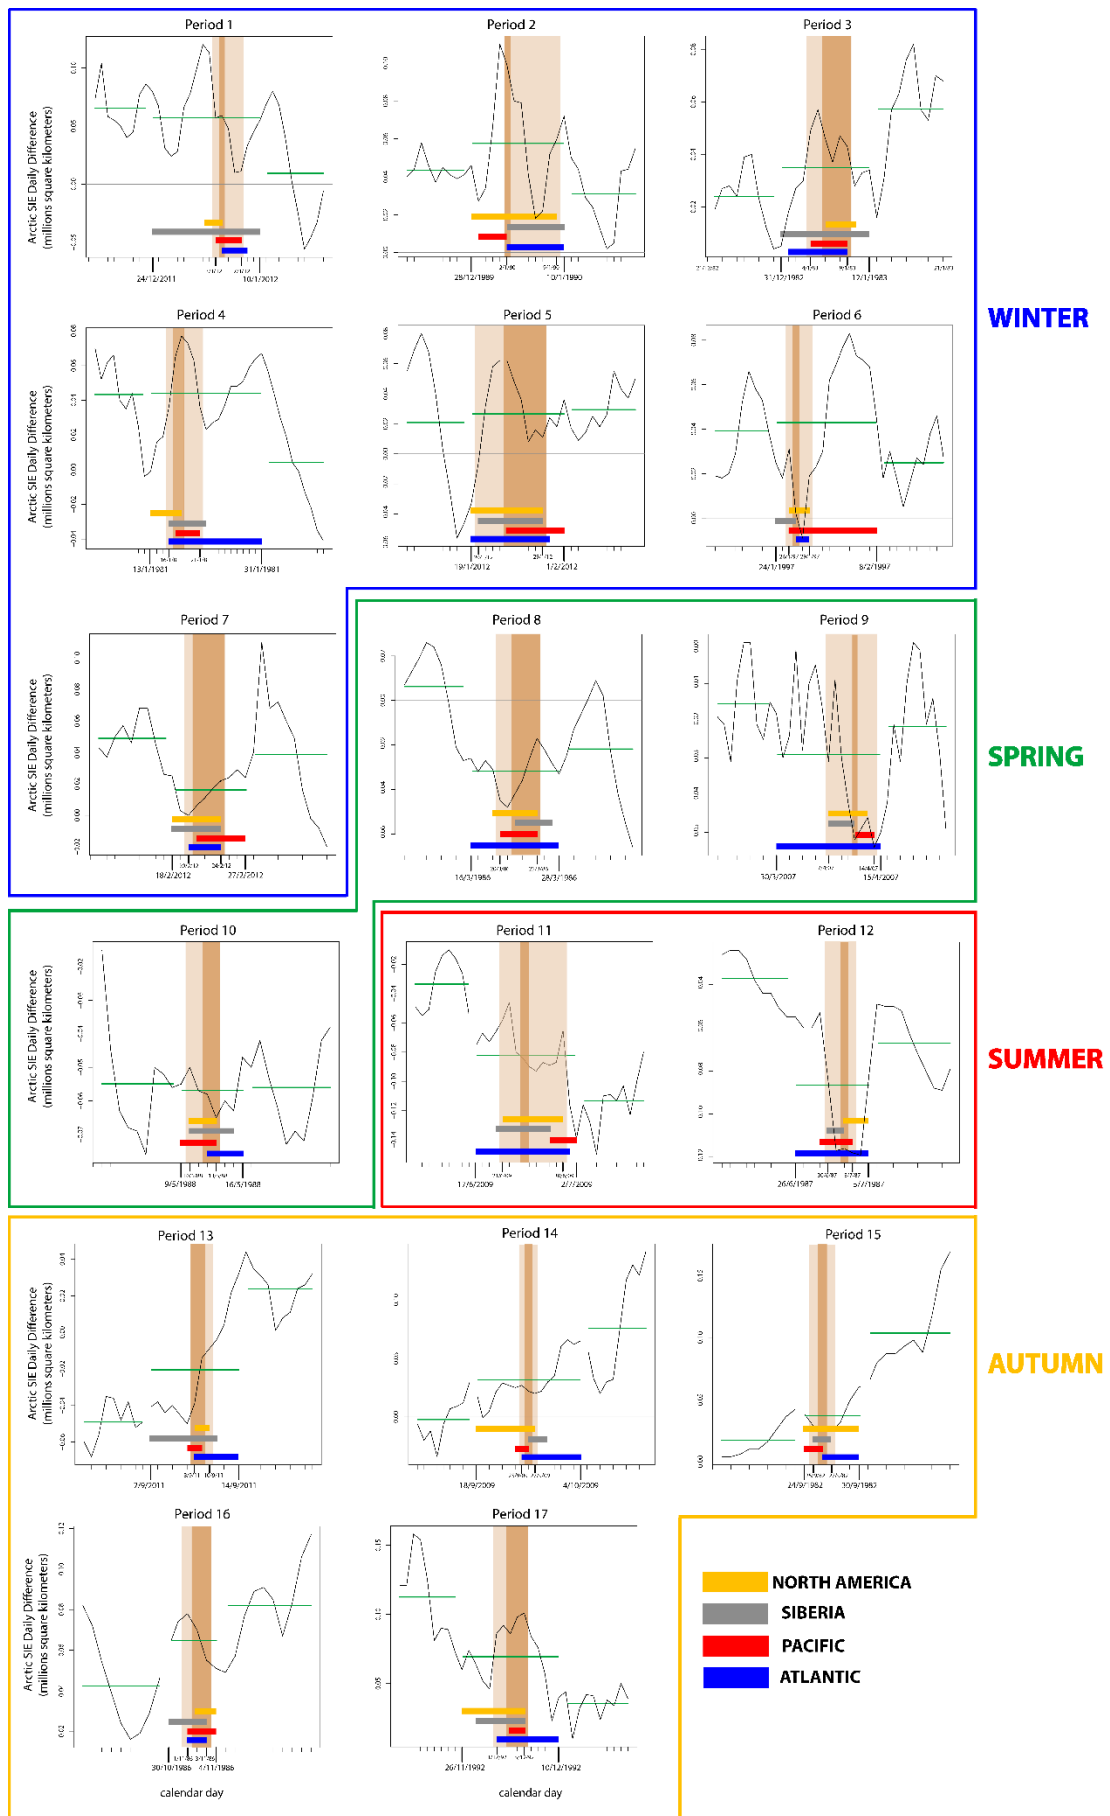

WINTER

SPRING

SUMMER

AUTUMN

NORTH AMERICA  
 SIBERIA  
 PACIFIC  
 ATLANTIC

19

20 **Figure S4**

21

|           | ARCTIC REGION                                                          |                                                           | BAFFIN                                                                                           |                                                                                                        | BERING                                                                                               |                                                                                           | CENTRAL ARCTIC                                                        |                                                                              | GREENLAND                                                                                        |                                                                                                       |
|-----------|------------------------------------------------------------------------|-----------------------------------------------------------|--------------------------------------------------------------------------------------------------|--------------------------------------------------------------------------------------------------------|------------------------------------------------------------------------------------------------------|-------------------------------------------------------------------------------------------|-----------------------------------------------------------------------|------------------------------------------------------------------------------|--------------------------------------------------------------------------------------------------|-------------------------------------------------------------------------------------------------------|
| MONTH     | Minimum                                                                | Máximum                                                   | Minimum                                                                                          | Máximum                                                                                                | Minimum                                                                                              | Máximum                                                                                   | Minimum                                                               | Máximum                                                                      | Minimum                                                                                          | Máximum                                                                                               |
| January   | 1984 1991<br>1996 2005<br>2006                                         | 1993 2003                                                 | <b>1980 1981</b><br><b>1982 1986</b><br>1988 1989<br>1997 2004<br>2010 2011                      | <b>1983 1984</b><br>1985 1991<br><b>1993 2008</b><br>2015 2016                                         | <b>1984 1985 1996</b><br><b>1997 2001 2003</b><br>2004 2005 2014<br>2015 2016                        | 1980 1981 1983<br>1989 1992 1995<br>1998 2000 2002<br><b>2006 2009 2012</b><br>2013       | 1985 1990<br><b>2006 2013</b><br>2016                                 | 2004 2009<br>2010 2011<br>2015                                               | <b>1984 1985</b><br><b>1991 1993</b><br>1994 1995<br>1999 2000<br>2005                           | 1981 1991<br>1986 1991<br><b>1989 1991</b><br><b>1998</b>                                             |
| February  | 1984 1991<br>2005 2006                                                 | 1987 1998<br>2008                                         | <b>1980 1981</b><br><b>1986 1987</b><br>1988 1998<br><b>2004 2010</b><br>2011                    | <b>1983 1984</b><br>1991 1993<br>1994 <b>2008</b><br>2014 2015<br>2016                                 | 1982 1985 1989<br><b>1994 1996 2001</b><br>2003 2005 2007<br><b>2014 2015 2016</b>                   | 1980 1981 1983<br>1984 1990 1991<br>1995 1998 1999<br><b>2002 2009 2010</b><br>2012 2013  | 1990 2001<br>2005 2006<br><b>2012 2014</b><br>2016                    | 2008 2009<br>2010 2011<br>2015                                               | <b>1984 1985</b><br>1990 1991<br>1994 1999<br>2000 2003<br>2016                                  | <b>1982 1991</b><br>1987 1991<br><b>1989 1991</b><br>1998 2001                                        |
| March     | 1981 1984<br>1989 1996<br>2005 <b>2006</b><br>2007 2015<br>2016        | 1988 1993<br>2001 2003<br>2008 2012                       | 1980 1981<br>1986 1987<br><b>1988 1996</b><br>1998 2004<br>2005 2006<br>2010 2011<br><b>2013</b> | <b>1983 1984</b><br>1985 1993<br>2000 <b>2008</b><br>2009 2012<br>2014 2015                            | 1982 1987 1989<br><b>1996 2001 2003</b><br>2005 2006 2011<br>2015 2016                               | 1984 1990 1992<br><b>1998 1999 2008</b><br>2010 2012 2013                                 | <b>1985 2012</b><br>2016                                              | 2009 2010<br>2011 2013<br>2015                                               | <b>1984 1985</b><br>1991 1993<br>1994 <b>1999</b><br>2000 2016                                   | 1982 1991<br>1988 1991<br>1996 1997<br>2001 2001                                                      |
| April     | <b>1989 1990</b><br><b>1996 2004</b><br>2005 2006<br>2007 2015<br>2016 | 1982 1993<br><b>1999 2001</b><br>2009 2010<br>2012        | <b>1980 1981</b><br><b>1986 1988</b><br>1996 1999<br>2005 2006<br>2010 2011<br>2013              | <b>1983 1984</b><br>1990 1991<br><b>1993 1994</b><br>2008 2009<br>2014 2015                            | 1981 1982 1989<br><b>1996 2002 2003</b><br>2004 2011 2014<br>2015 2016                               | 1984 1985 1988<br>1991 1992 1994<br>1995 1999 2000<br>2008 2009 2010<br><b>2012</b>       | 1995 2006<br><b>2012 2016</b>                                         | 2007 2008<br>2009 2011<br>2014                                               | 1983 <b>1984</b><br><b>1993 1994</b><br>1999 2004<br>2006 2016                                   | <b>1982 1991</b><br>1986 1991<br>1996 1997<br>2001 2001                                               |
| May       | 1983 <b>1989</b><br>1995 1996<br><b>2004 2006</b><br>2016              | 1982 <b>1985</b><br>1994 1998<br><b>1999 2001</b><br>2009 | <b>1980 1981</b><br><b>1986 1988</b><br>1989 1995<br>1996 2004<br>2005 2006<br>2010 2011<br>2016 | <b>1983 1984</b><br>1990 1991<br>1992 <b>1993</b><br>2001 2007<br>2009 2014<br>2015                    | 1981 1983 1989<br><b>1996 1997 2002</b><br><b>2003 2004 2011</b><br><b>2014 2015 2016</b>            | 1984 1985 1991<br>1992 1994 1999<br>2000 2006 2008<br>2010 2012 2013                      | 2004 2006<br><b>2013 2016</b>                                         | 2002 2003<br>2005 2007<br>2008 2011<br>2012 2014<br>2015                     | 1980 1983<br><b>1984 1991</b><br>1993 <b>1994</b><br><b>1999 2004</b><br>2006 2016               | 1981 1991<br>1986 1991<br>1995 1997<br>1997 2001<br>2008 2001                                         |
| June      | 1990 1995<br>2006 2010<br>2016                                         | 1982 1987<br>1999 2013                                    | 1980 1981<br><b>1986 1988</b><br>1995 2006<br>2012 2016                                          | 1982 <b>1983</b><br>1984 1990<br>1991 1993<br>1999 2007<br>2013 2015                                   | 1981 1986 1988<br>1989 1993 1995<br><b>1997 2001 2002</b><br>2003 2007 2008<br><b>2011 2015 2016</b> | 1984 <b>1985 1987</b><br><b>1992 1999 2000</b><br><b>2006 2012 2013</b>                   | <b>1988 2006</b><br>2010 2015<br>2016                                 | 2007 2008<br>2009 2013<br>2014                                               | 1980 1983<br>1984 1985<br>1991 1994<br>1999 2004<br>2010 2016                                    | 1981 1991<br>1992 1997<br>1997 1997<br>2001 2001<br>2012                                              |
| July      | 1990 1995<br>2007 2011                                                 | 1992 1996<br>2015                                         | 1981 <b>1985</b><br>1988 2003<br>2012 2014                                                       | <b>1983 1984</b><br>1993 <b>1996</b><br>2004 2015                                                      | 1980 <b>1988 1991</b><br>1997 2008 2010<br>2011                                                      | <b>1983 1992 1996</b><br>2006 2016                                                        | 1984 <b>1994</b><br>2004 <b>2006</b><br>2010 2012<br><b>2013 2016</b> | 2002 2003<br>2005 2008<br>2009 2014                                          | <b>1985 1991</b><br><b>1999 2002</b><br>2004 2009<br>2010 2013<br><b>2016</b>                    | 1981 1991<br>1989 1997<br>1997 1997<br>2000 2001<br>2012 2001                                         |
| August    | 1990 1995<br>2007 2012                                                 | 1996                                                      | 1981 <b>1985</b><br>1990 1991<br>1994 1997<br>2001                                               | <b>1983 1986</b><br>1992 1993<br><b>1996 1999</b><br>2015                                              | 2012 2013 2014<br>2015                                                                               | 2016                                                                                      | <b>1984 1985</b><br>1995 1999<br>2004 2007<br><b>2012 2013</b>        | 1980 1981<br>1982 1989<br>1997 2002<br>2003 2008<br><b>2009 2010</b><br>2014 | <b>1984 1985</b><br><b>1991 1996</b><br><b>2002 2003</b><br>2004 2013<br>2016                    | 1981 1991<br>1989 1997<br>1995 1997<br>1998 2001<br>2005 2001<br>2011                                 |
| September | 1990 1995<br>2007 2012                                                 | 1992 1996                                                 | 1980 1981<br>1985 1987<br><b>1988 1991</b><br>1994 2014                                          | 1982 <b>1983</b><br>1992 <b>1996</b><br>2013 2015                                                      | <b>1984 1985 1990</b><br>1998 2003 2004                                                              | 1980 1981 1982<br><b>1994 1995 2005</b><br>2006 2007                                      | 1984 1985<br>2001 2007<br><b>2012 2013</b>                            | 2002 2003<br>2006 2008<br>2009 2010<br>2015                                  | <b>1984 1985</b><br><b>1990 1991</b><br><b>1996 2001</b><br><b>2002 2003</b><br><b>2004 2013</b> | 1980 1991<br>1982 1991<br><b>1989 1991</b><br>1993 1997<br><b>1995 1997</b><br>1999 2001<br>2005 2001 |
| October   | 1984 1985<br>2007 2016                                                 | 1982 1986<br>2008 2013<br>2014                            | <b>1981 1984</b><br><b>1985 1988</b><br>1991 1992<br>1998 2002<br>2012                           | 1982 <b>1983</b><br><b>1986 1990</b><br><b>1996 1997</b><br>2011                                       | 1981 <b>1987 1988</b><br>1997 1998                                                                   | <b>1983 1985 1992</b><br>1994 1996 2004<br>2016                                           | 1984 1990<br>1995 2001<br>2007 2009<br><b>2012 2013</b>               | 2002 2003<br>2005 2006<br>2008 2010<br>2014                                  | 1984 <b>1985</b><br>1990 1991<br>1996 2001<br><b>2002 2004</b><br>2010 2013                      | 1981 1991<br>1988 1997<br>1993 1997<br>1999 2001<br>2006 2001<br>2012                                 |
| November  | 1981 1996<br>2006 2016                                                 | 1982 1992<br>1993 2008<br>2014                            | 1984 1985<br><b>1988 1994</b><br><b>2002 2003</b><br>2006 2010<br>2012 2016                      | 1982 <b>1983</b><br><b>1986 1990</b><br>1993 1996<br><b>1999 2007</b><br>2008 2009<br>2011 <b>2015</b> | 1980 1984 1986<br>1987 1990 1993<br>1997 1998 2000<br>2002 2003 2004<br>2006 2007 2010<br>2014 2016  | 1981 <b>1983 1988</b><br><b>1992 1994 1999</b><br>2001 2005 2009<br>2011 2012             | <b>1984 2009</b><br><b>2012 2016</b>                                  | 2005 2008<br>2010 2011<br>2014                                               | <b>1984 1985</b><br>1986 1990<br>1991 1993<br><b>2002 2003</b><br>2004 2016                      | 1980 1991<br>1987 1991<br>1994 1997<br><b>1997 2001</b><br>2007                                       |
| December  | 1984 1985<br>2010 2016                                                 | 1982 1988                                                 | 1980 1981<br><b>1985 1988</b><br>1989 1997<br>2010                                               | <b>1982 1983</b><br>1984 1986<br><b>1992 1993</b><br>2007 2008<br>2015                                 | 1983 1984 <b>1985</b><br>1986 1991 1995<br>1996 2000 2002<br>2006 2007 2010<br>2013 2014             | 1980 1981 1987<br><b>1988 1992 1994</b><br><b>1999 2001 2005</b><br><b>2009 2011 2012</b> | 1984 2006<br>2009 2012<br>2015 2016                                   | 2010 2011<br>2013 2014                                                       | <b>1984 1986</b><br>1990 1991<br>1992 1993<br>2002 2016                                          | 1980 1991<br>1987 1991<br><b>1989 1991</b><br>1997                                                    |

**Table SI.** Minimum and maximum SIE years by month and Ocean Arctic subregion. In bold those most extreme years using one standard deviation, the rest of the years using the half of one standard deviation

| MONTH     | Atlantic                     |                             | Pacific                     |                             | North American              |                             | Siberian                    |                             |
|-----------|------------------------------|-----------------------------|-----------------------------|-----------------------------|-----------------------------|-----------------------------|-----------------------------|-----------------------------|
|           | Minimum<br>Mean<br><i>SD</i> | Máximo<br>Mean<br><i>SD</i> | Mínimo<br>Mean<br><i>SD</i> | Máximo<br>Mean<br><i>SD</i> | Mínimo<br>Mean<br><i>SD</i> | Máximo<br>Mean<br><i>SD</i> | Mínimo<br>Mean<br><i>SD</i> | Máximo<br>Mean<br><i>SD</i> |
| January   | 3418<br>2001                 | 2924<br>1682                | 6009<br>2789                | 7480<br>3101                | 5568<br>1806                | 5284<br>1521                | 3369<br>1040                | 3067<br>878                 |
| February  | 3880<br>1959                 | 3206<br>1705                | 5937<br>2773                | 6831<br>3488                | 5473<br>1887                | 5405<br>1625                | 3279<br>1003                | 3092<br>859                 |
| March     | 3102<br>1431                 | 3173<br>1653                | 6373<br>3149                | 7206<br>2388                | 5056<br>1527                | 5418<br>1590                | 3767<br>1592                | 3452<br>1164                |
| April     | 3998<br>2108                 | 3842<br>1559                | 8265<br>3153                | 8123<br>2593                | 5736<br>1727                | 6215<br>1741                | 4085<br>1182                | 4609<br>1711                |
| May       | 2878<br>1364                 | 3554<br>1443                | 9236<br>3297                | 9709<br>3509                | 7339<br>2001                | 8157<br>2213                | 5650<br>2146                | 5923<br>1650                |
| June      | 3789<br>1466                 | 3331<br>1879                | 9540<br>3420                | 10133<br>4619               | 9785<br>2871                | 9465<br>3006                | 8066<br>2989                | 8240<br>2441                |
| July      | 4177<br>2383                 | 3450<br>1757                | 12484<br>4902               | 14646<br>5209               | 12283<br>2958               | 11498<br>2431               | 9325<br>3494                | 9780<br>3709                |
| August    | 4562<br>2500                 | 3615<br>1696                | 15164<br>5906               | 15503<br>4620               | 12709<br>3293               | 12142<br>2509               | 10183<br>4364               | 10438<br>3415               |
| September | 4552<br>2048                 | 4659<br>2357                | 11685<br>5018               | 11733<br>4867               | 1257<br>2805                | 11515<br>2991               | 8900<br>2685                | 8308<br>2367                |
| October   | 4454<br>2507                 | 4206<br>2237                | 7911<br>3674                | 7887<br>3621                | 9395<br>2464                | 9361<br>3172                | 6545<br>1654                | 6807<br>1555                |
| November  | 4978<br>2605                 | 4305<br>2475                | 6434<br>2635                | 6744<br>2806                | 6631<br>2183                | 6552<br>1903                | 4635<br>1889                | 4285<br>1306                |
| December  | 3795<br>1819                 | 3136<br>1394                | 6811<br>3247                | 6177<br>2675                | 6217<br>1664                | 5979<br>1643                | 4315<br>1202                | 3698<br>988                 |

**Table SII.** Mean and standard deviation of Moisture transport for precipitation (MTP) in mm/day for minimum and maximum SIE years by month

|           | Atlantic                        |                                 |                                 |                                 |                                 |                                 |                                 |                                 |
|-----------|---------------------------------|---------------------------------|---------------------------------|---------------------------------|---------------------------------|---------------------------------|---------------------------------|---------------------------------|
| MONTH     | CTC1                            |                                 | CTC2                            |                                 | CTC3                            |                                 | CTC4                            |                                 |
|           | <i>Minimum MTP<br/>(% days)</i> | <i>Maximum MTP<br/>(% days)</i> |
| January   | 3787.55<br>51.6%                | 3162.51<br>59.7%                | 3482.77<br>32.9%                | 2701.19<br>27.4%                | 3234.39<br>14.2%                | 3489.43<br>9.7%                 | 883.31<br>1.3%                  | 2840.80<br>3.2%                 |
| February  | 4023.38<br>27.7%                | 2793.80<br>42.9%                | 3736.06<br>33.9%                | 3396.76<br>22.6%                | 3846.58<br>27.7%                | 3583.27<br>23.8%                | 3231.25<br>10.7%                | 3271.24<br>10.7%                |
| March     | 3238.71<br>31.2%                | 3272.96<br>37.6%                | 2904.72<br>33.7%                | 2745.04<br>38.7%                | 2902.46<br>20.1%                | 2838.40<br>16.1%                | 2668.22<br>15.0%                | 1910.13<br>7.5%                 |
| April     | 3135.33<br>20.7%                | 4635.51<br>16.7%                | 4066.06<br>47.8%                | 4162.66<br>60.9%                | 3694.50<br>20%                  | 3482.88<br>19.0%                | 2934.99<br>11.5%                | 4853.62<br>3.3%                 |
| May       | 3431.05<br>10,1%                | 3621.75<br>16,1%                | 2828.17<br>64%                  | 3806.68<br>58.5%                | 2331.59<br>14.3%                | 2816.89<br>12.9%                | 3353.99<br>11.5%                | 3050.06<br>12.4%                |
| June      | 4266.28<br>30.0%                | 2752.03<br>35.8%                | 3943.31<br>44.7%                | 3395.75<br>37.5%                | 4058.04<br>18.0%                | 2455.90<br>18.3%                | 3828.43<br>7.3%                 | 2720.04<br>8.3%                 |
| July      | 3488.69<br>27.4%                | 3553.77<br>37.6%                | 3907.42<br>54.8%                | 3227.08<br>43.0%                | 3377.09<br>10.5%                | 2549.83<br>19.4%                | 4092.94<br>7.3%                 |                                 |
| August    | 4455.81<br>37.1%                | 3084.94<br>83.9%                | 4243.38<br>41.1%                | 4971.53<br>16.1%                | 4293.70<br>12.9%                |                                 | 4211.59<br>8.9%                 |                                 |
| September | 5377.96<br>49.2%                | 4193.98<br>26.7%                | 5348.82<br>23.3%                | 4193.23<br>61.7%                | 4898.87<br>26.7%                | 3809.38<br>8.3%                 | 8236.77<br>0.8%                 | 4495.81<br>3.3%                 |
| October   | 4023.90<br>37.9%                | 3450.67<br>45.1%                | 4018.23<br>51.6%                | 2970.79<br>38.7%                | 4697.64<br>6.4%                 | 4421.52<br>10.3%                | 4280.59<br>4.0%                 | 3317.37<br>5.8%                 |
| November  | 5278.35<br>32.5%                | 3336.36<br>49.3%                | 4326.46<br>31.6%                | 3180.29<br>33.3%                | 3765.35<br>35.0%                | 3581.52<br>15.3%                | 2064.46<br>0.8%                 | 2922.36<br>2.0%                 |
| December  | 2562.12<br>35.5%                | 3430.99<br>9.7%                 | 3398.73<br>46.0%                | 3838.93<br>54.8%                | 1929.66<br>4.8%                 | 2867.38<br>12.9%                | 5046.37<br>13.7%                | 3534.09<br>22.6%                |

|         | Pacific                         |                                 |                                 |                                 |                                 |                                 |                                 |                                 |
|---------|---------------------------------|---------------------------------|---------------------------------|---------------------------------|---------------------------------|---------------------------------|---------------------------------|---------------------------------|
| MONTH   | CTC1                            |                                 | CTC2                            |                                 | CTC3                            |                                 | CTC4                            |                                 |
|         | <i>Minimum MTP<br/>(% days)</i> | <i>Maximum MTP<br/>(% days)</i> |
| January | 6443.08<br>26.5%                | 7693.79<br>22.6%                | 7185.12<br>48.4%                | 7155.20<br>32.3%                | 6934.64<br>22.6%                | 4364.03<br>33.9%                | 7300.61<br>2.6%                 | 6533.42<br>11.3%                |



|           |                  |                  |                  |                  |                  |                  |                  |                  |
|-----------|------------------|------------------|------------------|------------------|------------------|------------------|------------------|------------------|
| February  | 5614.33<br>39.3% | 4894.68<br>60.7% | 6831.95<br>31.2% | 5579.81<br>27.4% | 6109.63<br>20.5% | 6011.46<br>11.9% | 7342.88<br>8.9%  |                  |
| March     | 6550.63<br>25.8% | 5929.06<br>32.8% | 5959.32<br>34.8% | 6114.91<br>39.8% | 6705.84<br>26.5% | 6077.74<br>18.3% | 6988.60<br>12.9% | 6410.80<br>9.1%  |
| April     | 8777.30<br>19.6% | 7612.12<br>40.5% | 7201.23<br>53.0% | 6730.55<br>41.9% | 7917.73<br>15.9% | 7640.35<br>11.9% | 7019.46<br>11.5% | 6724.62<br>5.7%  |
| May       | 9570.52<br>24.0% | 10010.9<br>33.6% | 9371.96<br>41.5% | 9095.30<br>41.9% | 8409.27<br>26.3% | 10966.8<br>19.4% | 10214.3<br>8.3%  | 7983.17<br>5.1%  |
| June      | 9937.83<br>28.0% | 9297.08<br>20.8% | 9949.03<br>52.7% | 9837.18<br>45.8% | 7630.47<br>12.7% | 10125.2<br>25%   | 10534.0<br>6.7%  | 8993.76<br>8.3%  |
| July      | 11802.5<br>19.4% | 13891.2<br>37.6% | 10668.1<br>53.2% | 9393.85<br>40.9% | 12830.9<br>26.6% | 8301.77<br>18.3% | 9156.12<br>0.8%  | 4255.96<br>3.2%  |
| August    | 15882.2<br>23.4% | 15894.9<br>32.3% | 14935.4<br>62.1% | 14869.5<br>38.7% | 15068.6<br>9.7%  | 13836.7<br>6.5%  | 13552.1<br>4.8%  | 11611.9<br>22.6% |
| September | 12733.6<br>34.2% | 16766.0<br>10.0% | 12526.0<br>53.3% | 12235.0<br>18.3% | 8867.43<br>4.2%  | 13371.8<br>51.7% | 7750.71<br>8.3%  | 11459.7<br>20.0% |
| October   | 9424.24<br>28.2% | 8592.36<br>38.7% | 6617.64<br>52.4% | 7695.57<br>37.4% | 9500.09<br>8.1%  | 8232.94<br>12.3% | 6174.59<br>11.3% | 6492.60<br>11.6% |
| November  | 5086.95<br>11.7% | 6518.55<br>28.0% | 5470.15<br>50.8% | 5865.47<br>54.0% | 8530.19<br>16.7% | 8291.72<br>2.7%  | 7985.45<br>20.8% | 5027.67<br>15.3% |
| December  | 6804.05<br>41.1% | 8215.79<br>61.3% | 7885.77<br>32.3% | 7156.56<br>8.1%  | 9317.63<br>18.5% | 7284.42<br>12.9% | 9067.25<br>8.1%  | 6462.37<br>17.8% |

29

|          | North America                   |                                 |                                 |                                 |                                 |                                 |                                 |                                 |
|----------|---------------------------------|---------------------------------|---------------------------------|---------------------------------|---------------------------------|---------------------------------|---------------------------------|---------------------------------|
| MONTH    | CTC1                            |                                 | CTC2                            |                                 | CTC3                            |                                 | CTC4                            |                                 |
|          | <i>Minimum MTP<br/>(% days)</i> | <i>Maximum MTP<br/>(% days)</i> |
| January  | 6468.58<br>58.7%                | 6220.54<br>43.5%                | 5967.46<br>35.5%                | 5598.85<br>45.2%                | 5099.64<br>4.5%                 | 3450.73<br>3.2%                 | 3501.54<br>1.3%                 | 3914.19<br>8.1%                 |
| February | 5128.88<br>30.4%                | 5128.51<br>36.9%                | 5356.18<br>46.4%                | 5717.72<br>34.5%                | 5662.53<br>18.7%                | 4475.36<br>16.7%                | 5512.24<br>4.5%                 | 5410.97<br>11.9%                |
| March    | 5608.35<br>40.5%                | 5721.74<br>41.4%                | 4831.23<br>34.1%                | 5378.87<br>41.4%                | 4857.55<br>14.0%                | 5026.67<br>15.0%                | 4210.56<br>11.5%                | 4505.82<br>2.2%                 |
| April    | 6987.56<br>26.7%                | 7102.86<br>24.3%                | 6274.94<br>39.3%                | 6270.81<br>46.7%                | 5969.62<br>20.7%                | 6298.47<br>24.8%                | 5362.54<br>13.3                 | 6335.90<br>4.3%                 |
| May      | 7603.92<br>17.1%                | 8355.18<br>24.9%                | 7542.51<br>48.4%                | 8204.47<br>45.6%                | 6999.44<br>21.7%                | 7852.73<br>21.7%                | 6803.12<br>12.9%                | 8103.97<br>7.8%                 |
| June     | 9460.53<br>30.7%                | 11397.1<br>20.8%                | 9981.03<br>52%                  | 10267.6<br>55%                  | 10466.4<br>11.3%                | 9447.06<br>20%                  | 9820.00<br>6.0%                 | 5864.61<br>4.2%                 |

|           |                  |                  |                  |                  |                  |                  |                  |                  |
|-----------|------------------|------------------|------------------|------------------|------------------|------------------|------------------|------------------|
| July      | 13274.6<br>17.8% | 11584.4<br>32.3% | 12167.4<br>54.0% | 10598.4<br>44.1% | 12836.1<br>28.2% | 13143.6<br>19.4% |                  | 9185.05<br>4.3%  |
| August    | 13350.0<br>23.4% | 14613.3<br>71.0% | 12589.1<br>63.7% | 10544.4<br>29.0% | 12142.0<br>12.9% |                  |                  |                  |
| September | 12805.1<br>30.8% | 11949.0<br>6.7%  | 11565.4<br>58.3% | 12906.3<br>68.3% | 13520.3<br>9.2%  | 13581.9<br>13.3% | 11355.6<br>1.7%  | 14979.5<br>11.7% |
| October   | 10868.9<br>21.0% | 8475.68<br>34.2% | 10166.3<br>62.1% | 8974.49<br>47.8% | 11026.1<br>10.5% | 10073.9<br>14.2% | 8796.34<br>6.5%  | 12164.1<br>3.9%  |
| November  | 7105.91<br>25%   | 6876.66<br>38.0% | 6259.72<br>50.8% | 7229.27<br>48.7% | 6772.31<br>14.2% | 5870.16<br>9.3%  | 5411.81<br>10%   | 7718.03<br>4.0%  |
| December  | 5503.79<br>26.6% | 7692.54<br>11.3% | 6651.83<br>48.4% | 6335.86<br>46.8% | 5790.68<br>14.5% | 5623.42<br>27.4% | 7275.68<br>10.5% | 5311.53<br>14.5% |

30

| Siberia   |                                     |                                     |                                     |                                     |                                     |                                     |                                     |                                     |
|-----------|-------------------------------------|-------------------------------------|-------------------------------------|-------------------------------------|-------------------------------------|-------------------------------------|-------------------------------------|-------------------------------------|
| MONTH     | CTC1                                |                                     | CTC2                                |                                     | CTC3                                |                                     | CTC4                                |                                     |
|           | <i>Minimum<br/>MTP<br/>(% days)</i> | <i>Maximum<br/>MTP<br/>(% days)</i> |
| January   | 3242.07<br>18.7%                    | 3827.27<br>51.6%                    | 2892.82<br>41.9%                    | 3380.71<br>40.3%                    | 3805.39<br>19.4%                    | 3218.08<br>8.1%                     | 2477.25<br>20%                      |                                     |
| February  | 3820.52<br>8.0%                     | 3545.24<br>23.8%                    | 2670.36<br>67.9%                    | 3172.80<br>63.1%                    | 2253.14<br>6.2%                     | 2895.52<br>13.1%                    | 2493.91<br>17.9%                    |                                     |
| March     | 3723.26<br>45.2%                    | 3687.61<br>53.2%                    | 3641.15<br>32.6%                    | 3976.11<br>22.6%                    | 2959.88<br>17.6%                    | 3557.75<br>22.6%                    | 3493.46<br>4.7%                     | 5155.09<br>1.6%                     |
| April     | 5161.72<br>30.7%                    | 5099.48<br>53.3%                    | 4149.49<br>31.5%                    | 4425.08<br>31.9%                    | 4697.69<br>19.6%                    | 4590.18<br>11.4%                    | 3962.57<br>18.1%                    | 3523.43<br>3.3%                     |
| May       | 5924.61<br>24.4%                    | 6700.40<br>29.0%                    | 5565.92<br>44.7%                    | 5544.10<br>46.5%                    | 5717.82<br>22.1%                    | 5537.79<br>15.2%                    | 5148.66<br>8.8%                     | 6023.88<br>9.2%                     |
| June      | 8065.88<br>40.7%                    | 6668.11<br>35.8%                    | 8318.70<br>34.7%                    | 7843.54<br>37.5%                    | 7979.85<br>14.0%                    | 7080.78<br>16.7%                    | 9586.02<br>10.7%                    | 8499.43<br>10.0%                    |
| July      | 8691.27<br>17.8%                    | 8047.46<br>39.8%                    | 9394.21<br>21.8%                    | 9321.64<br>21.5%                    | 9342.75<br>33.9%                    | 9160.71<br>16.1%                    | 11426.3<br>26.6%                    | 9759.74<br>22.6%                    |
| August    | 8420.09<br>39.5%                    | 8278.63<br>45.2%                    | 10039.2<br>36.3%                    | 9340.10<br>38.7%                    | 9959.05<br>11.3%                    | 14082.8<br>9.7%                     | 11746.7<br>12.9%                    | 14052.5<br>6.5%                     |
| September | 7429.51<br>15.8%                    | 7627.31<br>10%                      | 7483.54<br>33.3%                    | 5949.92<br>26.7%                    | 7693.30<br>40.0%                    | 7448.58<br>33.3%                    | 9214.99<br>10.8%                    | 5421.27<br>30%                      |
| October   | 5980.44<br>33.9%                    | 6975.68<br>56.8%                    | 6145.97<br>46.0%                    | 7192.62<br>26.5%                    | 6575.69<br>12.9%                    | 6269.56<br>16.8%                    | 6403.63<br>7.3%                     |                                     |
| November  | 3993.39<br>15.8%                    | 4964.31<br>44.7%                    | 4271.06<br>69.2%                    | 3680.47<br>41.3%                    | 4301.23<br>13.3%                    | 4383.59<br>14%                      | 3025.90<br>1.7%                     |                                     |

|          |                  |                  |                  |                  |                  |                  |                 |                 |
|----------|------------------|------------------|------------------|------------------|------------------|------------------|-----------------|-----------------|
| December | 4360.41<br>29.0% | 5458.12<br>21.0% | 4043.97<br>49.2% | 4745.69<br>54.8% | 3298.96<br>16.9% | 4040.08<br>21.0% | 3753.79<br>4.8% | 3394.28<br>3.2% |
|----------|------------------|------------------|------------------|------------------|------------------|------------------|-----------------|-----------------|

31

32 **Table SIII.** Mean Moisture transport for precipitation (MTP) in mm/day for days grouped in every of the  
33 CTCs considering minimum and maximum SIE years by month; and percentage of days gruped on every  
34 CTC.

35

391 **Captions (Supplementary Material)**

392 **Figure S1** As for Figure 2 for all months

393 **Figure S2** As for Figure 5 for all months

394 **Figure S3** Anomalies of geopotential height at 850 hPa (Z850) for the four types of circulation centred on the  
395 four source sectors (classes CTC1 to CTC4) for the four seasons

396 **Figure S4** As for Figure 9 but for the seventeen detected Ext-MTPs

397
